- postoperative transfusion-associated circulatory overload. *ANESTHESIOLOGY* 2017; 126:409–18
6. Roubinian NH, Looney MR, Kor DJ, Lowell CA, Gajic O, Hubmayr RD, Gropper MA, Koenigsberg M, Wilson GA, Matthay MA, Toy P, Murphy EL; TRALI Study Group: Cytokines and clinical predictors in distinguishing pulmonary transfusion reactions. *Transfusion* 2015; 55: 1838–46
  7. Andrzejewski C Jr, Popovsky MA, Stec TC, Provencher J, O'Hearn L, Visintainer P, Steingrub J: Hemotherapy bedside biovigilance involving vital sign values and characteristics of patients with suspected transfusion reactions associated with fluid challenges: Can some cases of transfusion-associated circulatory overload have proinflammatory aspects? *Transfusion* 2012; 52:2310–20
  8. Murphy EL, Kwaan N, Looney MR, Gajic O, Hubmayr RD, Gropper MA, Koenigsberg M, Wilson G, Matthay M, Bacchetti P, Toy P; TRALI Study Group: Risk factors and outcomes in transfusion-associated circulatory overload. *Am J Med* 2013; 126:357.e29–38
  9. Escobar GJ, LaGuardia JC, Turk BJ, Ragins A, Kipnis P, Draper D: Early detection of impending physiologic deterioration among patients who are not in intensive care: Development of predictive models using data from an automated electronic medical record. *J Hosp Med* 2012; 7:388–95
  10. Lieberman L, Maskens C, Cserti-Gazdewich C, Hansen M, Lin Y, Pendergrast J, Yi QL, Callum J: A retrospective review of patient factors, transfusion practices, and outcomes in patients with transfusion-associated circulatory overload. *Transfus Med Rev* 2013; 27:206–12

## ANESTHESIOLOGY REFLECTIONS FROM THE WOOD LIBRARY-MUSEUM

### Civil War Chloroform Tin from a U.S. Army Coolidge Carrier Set

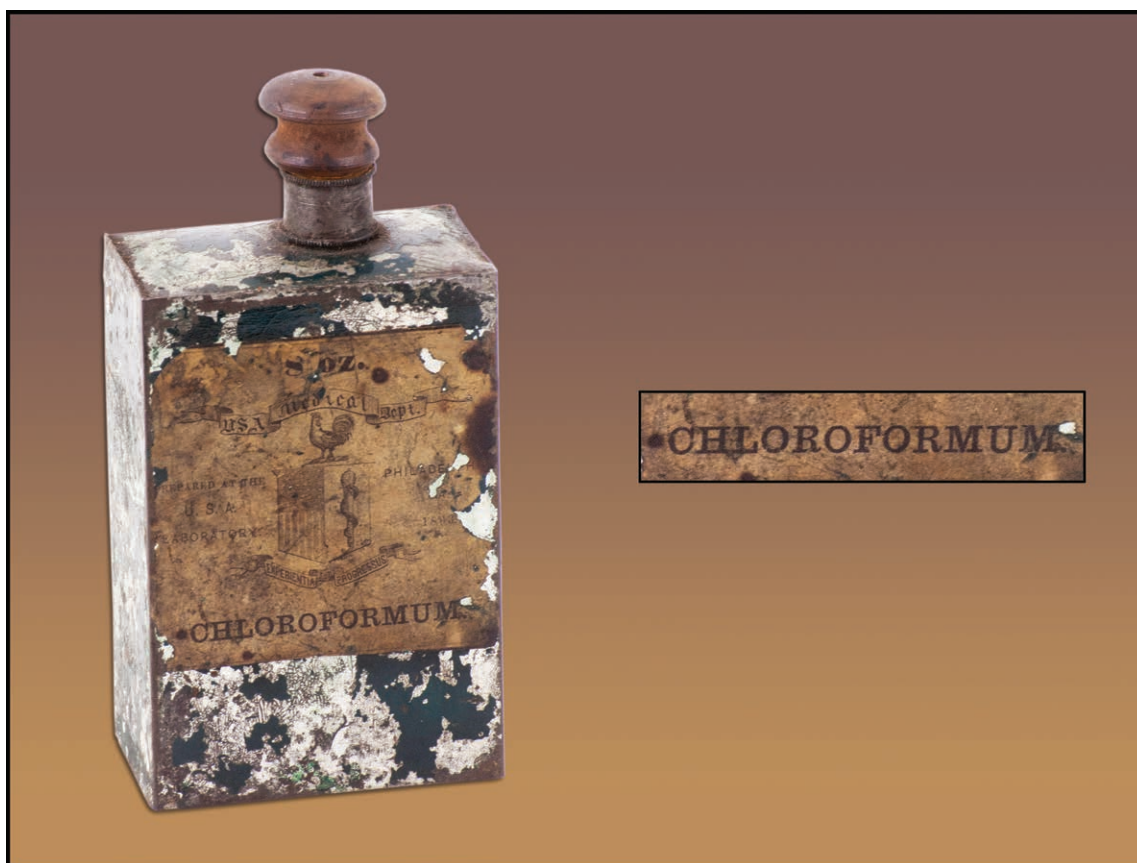

Richard H. Coolidge, M.D. (1816 to 1866), served the U.S. Army as an assistant surgeon and medical inspector. In 1863, he designed a compact field case, the U.S. Army Surgeon's Field Companion (or "Coolidge Carrier Set"), which housed needles, sutures, bandages, and tins of essential pharmaceuticals such as ginger, ipecac, opium, quinine, and chloroform (*left*). This 8-ounce tin was marked "CHLOROFORMUM" (*right*) and labeled as "Prepared at the / U.S.A. [United States Army] Laboratory / Philadelphia / Pa. / 1863." Because this tin was inspected officially, it bore the coat of arms of the U.S. Army Medical Department, with the cockerel of vigilance cresting an escutcheon bearing the staff of Aesculapius (sinister) and the 20-star U.S. flag (dexter) from the 1818 year of departmental founding, all surmounting the Latin motto *Experientia et Progressus*. (Copyright © the American Society of Anesthesiologists' Wood Library-Museum of Anesthesiology.)

George S. Bause, M.D., M.P.H., *Honorary Curator and Laureate of the History of Anesthesia, Wood Library-Museum of Anesthesiology, Schaumburg, Illinois, and Clinical Associate Professor, Case Western Reserve University, Cleveland, Ohio.* UJYC@aol.com.
